# Supplementary material for: In-school adolescents’ loneliness, social support, and suicidal ideation in sub-Saharan Africa: Leveraging Global School Health data to advance mental health focus in the region
Source: PubMed Central journal article supplement (PMC9645589; doi:10.1371/journal.pone.0275660), 2022-11-09
Supplement: pone.0275660.s001.pdf [file pone.0275660.s001.pdf]

**Table S1. Study variables**

| <b>Variables</b>                              | <b>Question</b>                                                                                                  | <b>Response options and recoding</b>                                                                      |
|-----------------------------------------------|------------------------------------------------------------------------------------------------------------------|-----------------------------------------------------------------------------------------------------------|
| <b>Outcome variable</b>                       |                                                                                                                  |                                                                                                           |
| Suicidal ideation                             | During the past 12 months, did you ever seriously consider attempting suicide?"                                  | 1 = yes, 2 = no<br>(Coded 2 = No; and 1 = Yes)                                                            |
| <b>Key explanatory variables</b>              |                                                                                                                  |                                                                                                           |
| Loneliness                                    | During the past 12 months, how often have you felt lonely?                                                       | 1=never, 2=rarely, 3= sometimes, 4 = most of the time to 5 = always<br>(coded as 1-3 = No; and 4-5 = Yes) |
| Peer support                                  | During the past 30 days, how often were most of the students in your school kind and helpful?                    | 1=never, 2=Rarely, 3=sometimes, 4=most of the times, 5=always<br>(Coded as 1-3 = No; and 4-5 = Yes)       |
| Close friends                                 | How many close friends do you have?                                                                              | 1=0 to 4=3 or more<br>(Coded as 1=No; and 2-4=Yes)                                                        |
| <b>Covariates</b>                             |                                                                                                                  |                                                                                                           |
| Age                                           | How old are you?                                                                                                 | 1=12, 2=13, 3=14, 4=15, 5=16, 6=17, 7=18 years (coded as 0=12-14, 15-19)                                  |
| Sex                                           | What is your sex?                                                                                                | 1=male, 2=female<br>(Coded 2=Female, 1=male)                                                              |
| Hunger (proxy of socioeconomic status)        | Went hungry past 30 days                                                                                         | 1=never, 2=Rarely, 3=sometimes, 4=most of the times, 5=always<br>(Coded 1-3=No; and 4-5=Yes)              |
| Tobacco use                                   | During the past 30 days, on how many days did you use any other form of tobacco, such as chewing tobacco leaves? | 1 = 0 days; to 7 = All 30 days<br>(Coded as 1 = No; and 2-7 = Yes)                                        |
| Alcohol use                                   | During the past 30 days, on how many days did you have at least one drink containing alcohol?                    | 1 = 0 days; to 7 = All 30 days<br>(Coded as 1 = No; and 2-7 = Yes)                                        |
| Cigarette smoking                             | During the past 30 days, how many days did you smoke cigarette?                                                  | 1 = 0 days; to 7 = All 30 days<br>(Coded as 1 = No; and 2-7 = Yes)                                        |
| Marijuana use                                 | During the past 30 days, how many times have you used marijuana (country examples)                               | 1=0 times; to 5=20 or more times<br>(coded as 1=No; and 2-5=Yes)                                          |
| Anxiety                                       | During the past 12 months, how often have you been so worried about something that you could not sleep at night? | 1 = never to 5 = always<br>(Coded 1 - 3 = No; and 4 - 5 = Yes)                                            |
| Parents check homework (parental supervision) | During the past 30 days, how often did your parents or guardians check to see if your homework was done?         | 1=never, 2=Rarely, 3=sometimes, 4=most of the times, 5=always<br>(Coded as 1-3 = No; and 4-5 = Yes)       |
| Understand problems (Parental                 | During the past 30 days, how often did your parents or guardians understand your problems and worries?           | 1=never, 2=Rarely, 3=sometimes, 4=most of the times, 5=always<br>(Coded as 1-3 = No; and 4-5 = Yes)       |

| Connectedness                                                    |                                                                                                                       |                                                                                                     |
|------------------------------------------------------------------|-----------------------------------------------------------------------------------------------------------------------|-----------------------------------------------------------------------------------------------------|
| Know what adolescent do free time (Parental or guardian Bonding) | During the past 30 days, how often did your parents or guardians really know what you were doing with your free time? | 1=never, 2=Rarely, 3=sometimes, 4=most of the times, 5=always<br>(Coded as 1-3= No; and 4-5 = Yes)  |
| Parental or guardian respect for Privacy                         | During the past 30 days, how often did your parents or guardians go through your things without your approval?        | 1=never, 2=Rarely, 3=sometimes, 4=most of the times, 5=always<br>(Coded as 1-3 = No; and 4-5 = Yes) |
